# Supplementary material for: Imidazolium-based ionic liquids with large weakly coordinating anions
Source: Royal Society of Chemistry journal article supplement (doi:10.1039/c6nj03674k), 2017-01-01
Supplement: c6nj03674k1.pdf [file c6nj03674k1.pdf]

Electronic Supplementary Information

for

## Imidazolium-based ionic liquids with large weakly coordinating anions

William Levason, David Pugh\* and Gillian Reid

Chemistry, University of Southampton, Highfield, Southampton, SO17 1BJ, UK

### Contents

|                                                                            |    |
|----------------------------------------------------------------------------|----|
| 1. X-ray structure of [BMPYRR][BAr <sup>F</sup> ]                          | 2  |
| 2. DSC traces                                                              | 3  |
| 3. NMR spectra:                                                            | 7  |
| • [EMIM][BAr <sup>F</sup> ]                                                | 7  |
| • [EDMIM][BAr <sup>F</sup> ]                                               | 9  |
| • [HMIM][BAr <sup>F</sup> ]                                                | 11 |
| • [EMBIM][BAr <sup>F</sup> ]                                               | 13 |
| • [IDiPPH][BAr <sup>F</sup> ]                                              | 15 |
| • [BMPYRR][BAr <sup>F</sup> ]                                              | 17 |
| • [EMIM][Al(O <sup>t</sup> C <sub>4</sub> F <sub>9</sub> ) <sub>4</sub> ]  | 19 |
| • [EDMIM][Al(O <sup>t</sup> C <sub>4</sub> F <sub>9</sub> ) <sub>4</sub> ] | 21 |
| • [HMIM][Al(O <sup>t</sup> C <sub>4</sub> F <sub>9</sub> ) <sub>4</sub> ]  | 23 |
| • [EMBIM][Al(O <sup>t</sup> C <sub>4</sub> F <sub>9</sub> ) <sub>4</sub> ] | 25 |

---

\* Corresponding author: email: [d.pugh@imperial.ac.uk](mailto:d.pugh@imperial.ac.uk); current address: Department of Chemistry, Imperial College London, South Kensington, London, SW7 2AZ, UK

### X-ray structure of [BMPYRR][BAR<sup>F</sup>]

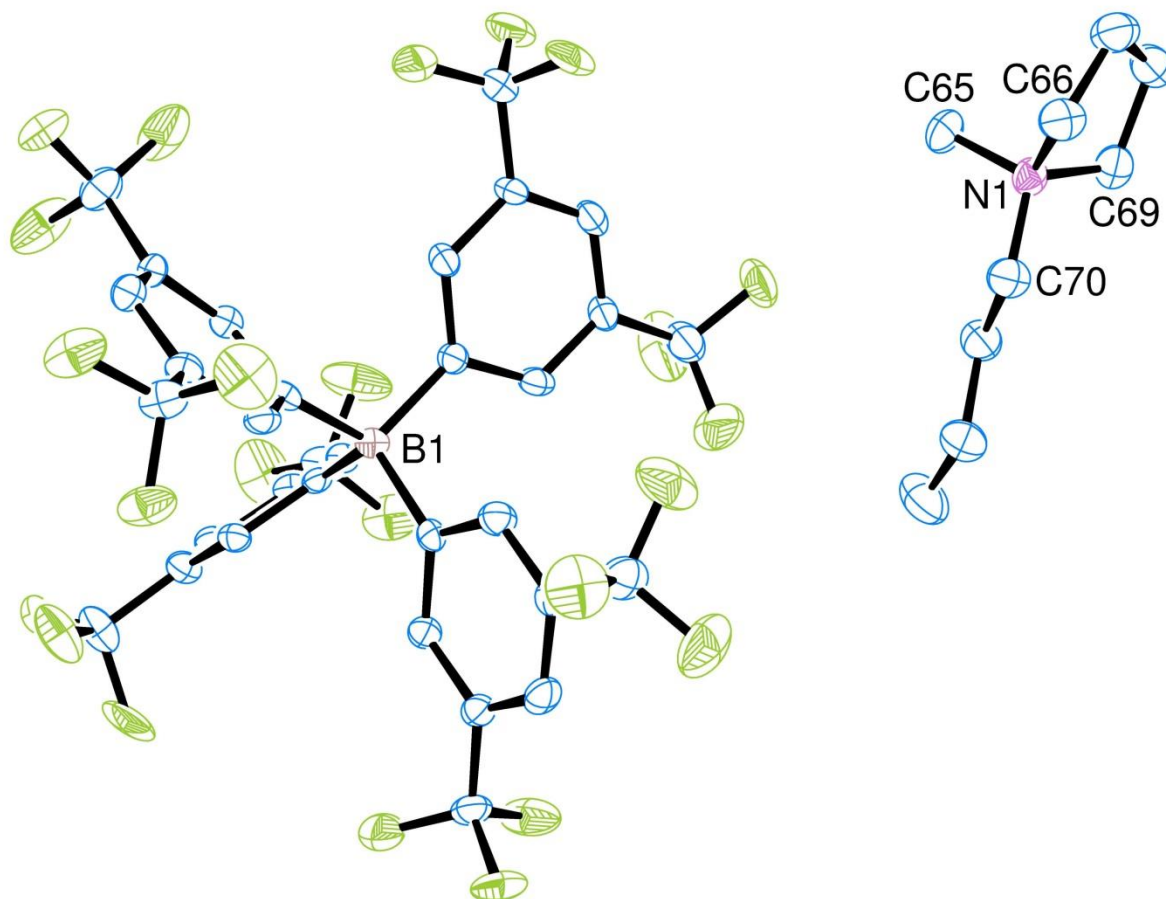

Figure S1: ORTEP representation of [BMPYRR][BAR<sup>F</sup>] showing one of two molecules in the asymmetric unit. Thermal ellipsoids are drawn at 50% probability and hydrogen atoms are omitted for clarity. For the X-ray CIF data, see Table 1 of the main manuscript.

## DSC traces

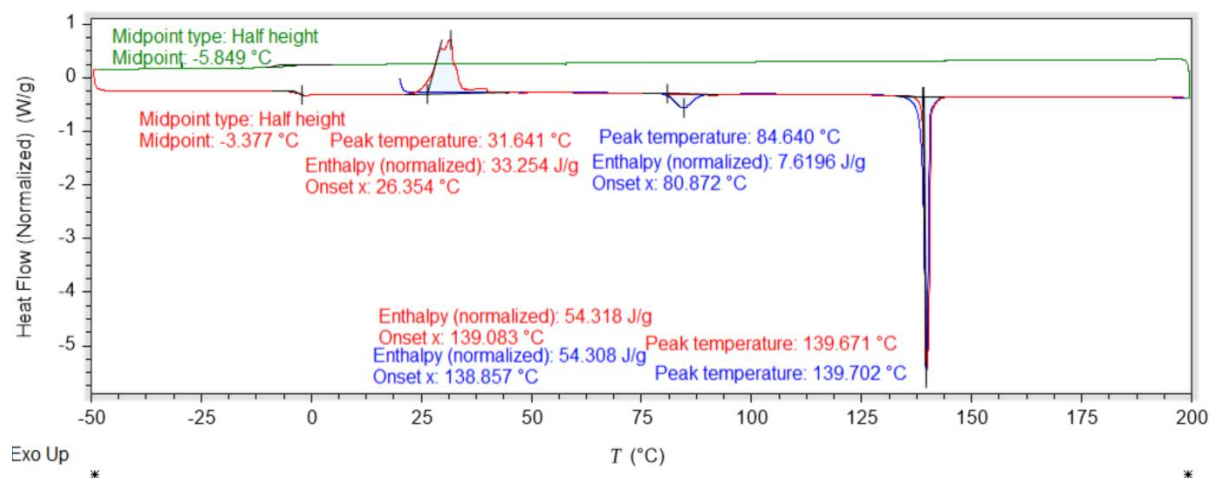

Figure S2: DSC trace for [EMIM][BARF]. Key: blue = first heating cycle, green = cooling cycle, red = second heating cycle.

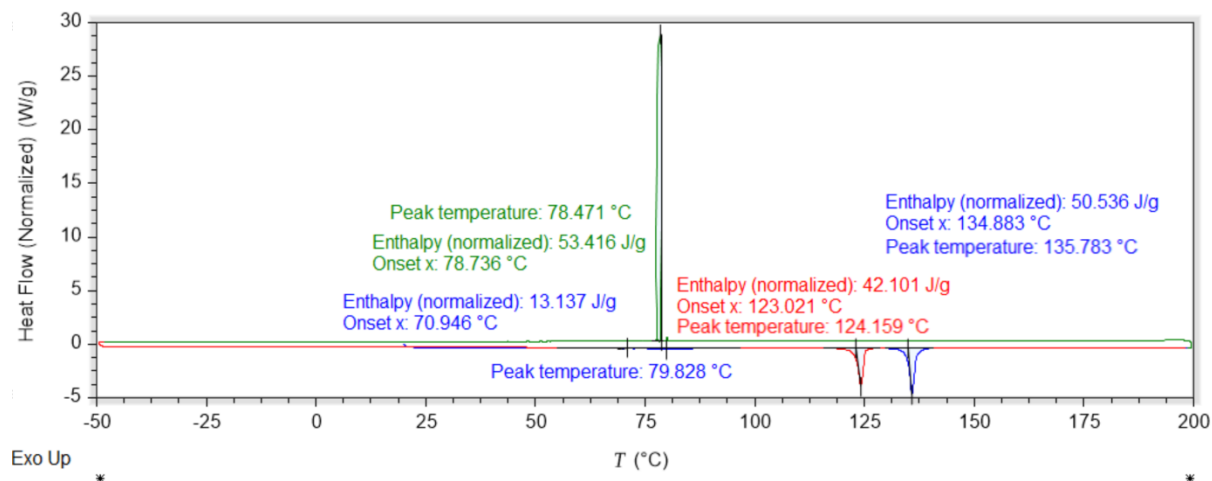

Figure S3: DSC trace for [EDMIM][BARF]. Key: blue = first heating cycle, green = cooling cycle, red = second heating cycle.

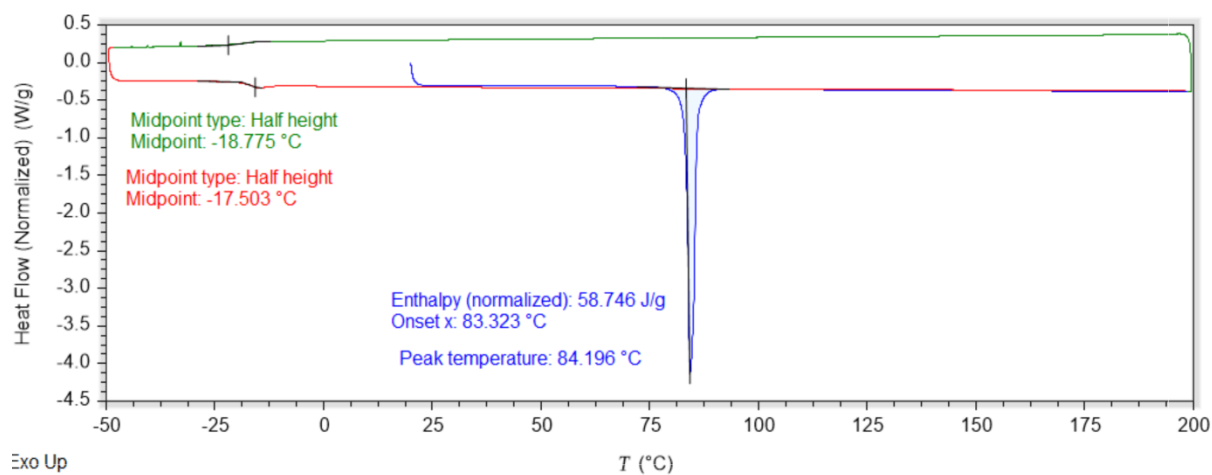

Figure S4: DSC trace for [HMIM][BARF]. Key: blue = first heating cycle, green = cooling cycle, red = second heating cycle.

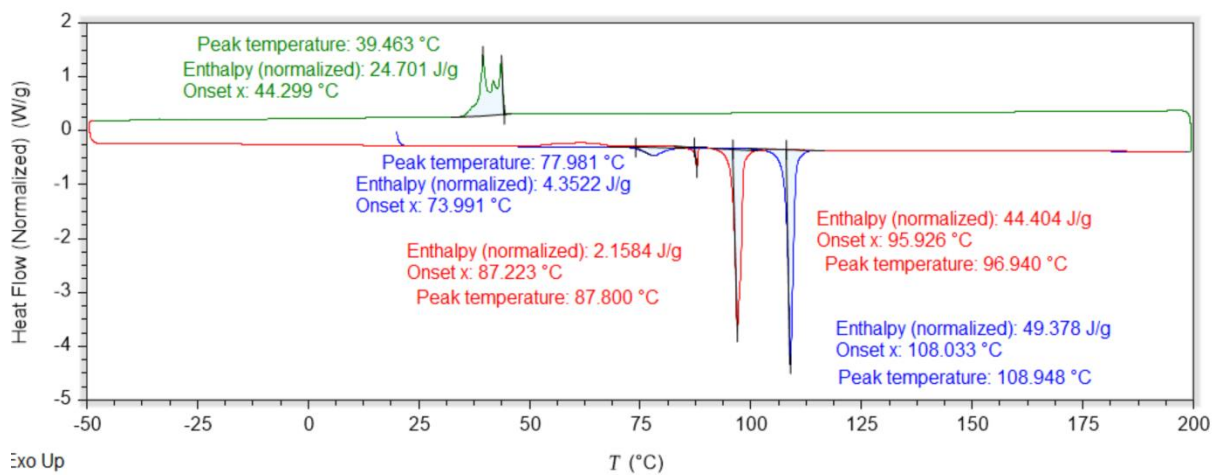

Figure S5: DSC trace for [EMBIM][BARF]. Key: blue = first heating cycle, green = cooling cycle, red = second heating cycle.

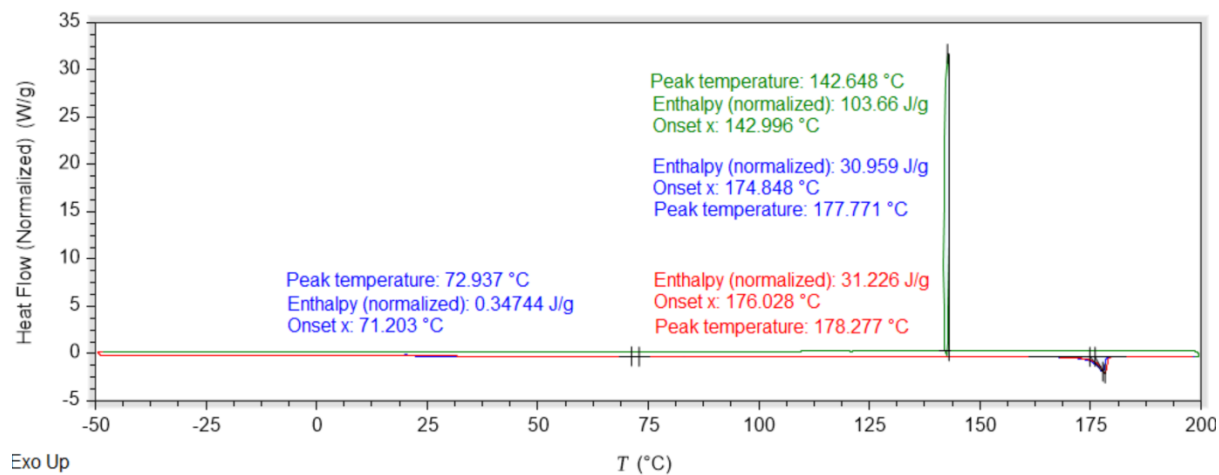

Figure S6: DSC trace for [EMIM][Al(O<sup>+</sup>C<sub>4</sub>F<sub>9</sub>)<sub>4</sub>]. Key: blue = first heating cycle, green = cooling cycle, red = second heating cycle.

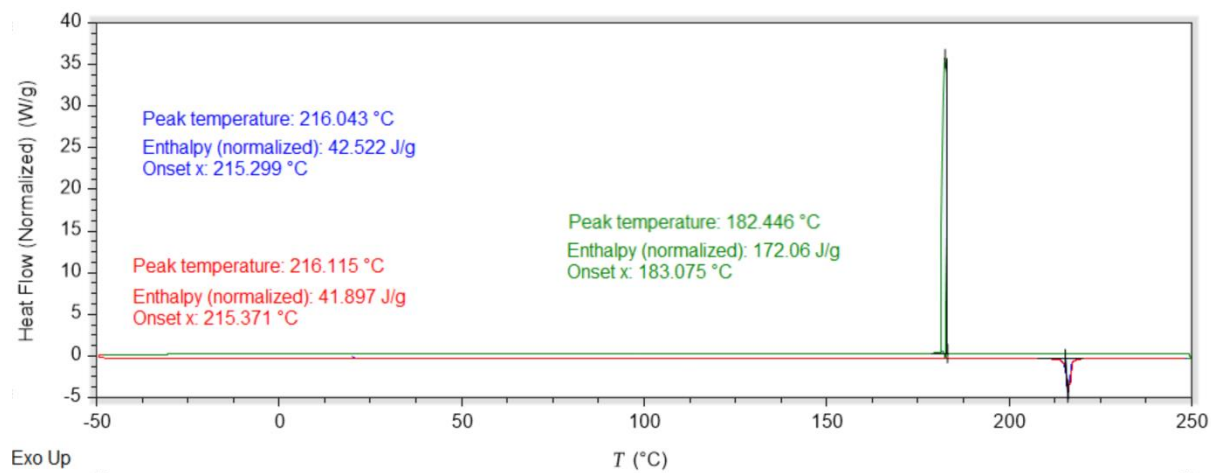

Figure S7: DSC trace for [EDMIM][Al(O<sup>+</sup>C<sub>4</sub>F<sub>9</sub>)<sub>4</sub>]. Key: blue = first heating cycle, green = cooling cycle, red = second heating cycle.

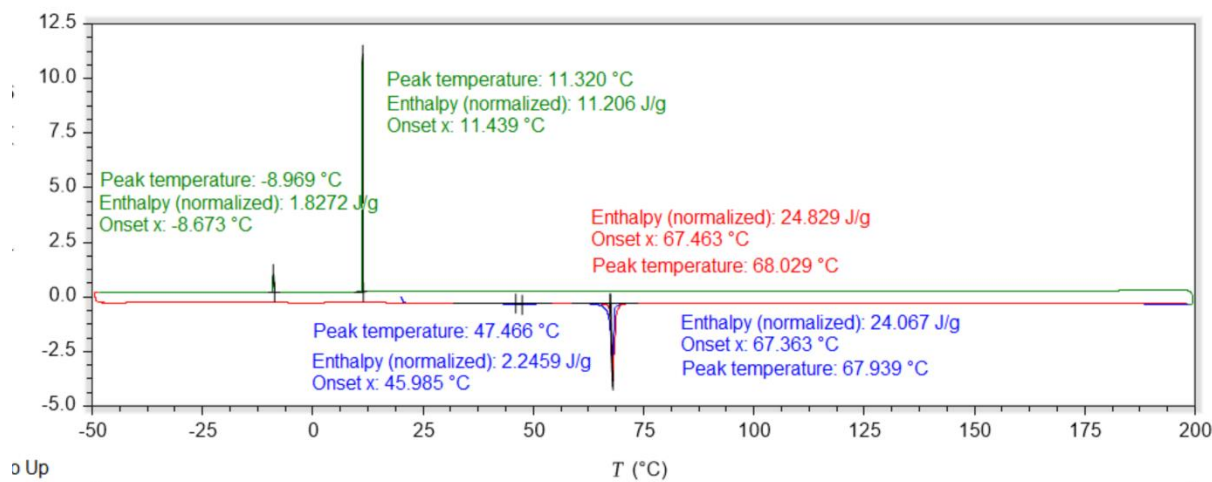

Figure S8: DSC trace for [HMIM][Al(O<sup>+</sup>C<sub>4</sub>F<sub>9</sub>)<sub>4</sub>]. Key: blue = first heating cycle, green = cooling cycle, red = second heating cycle.

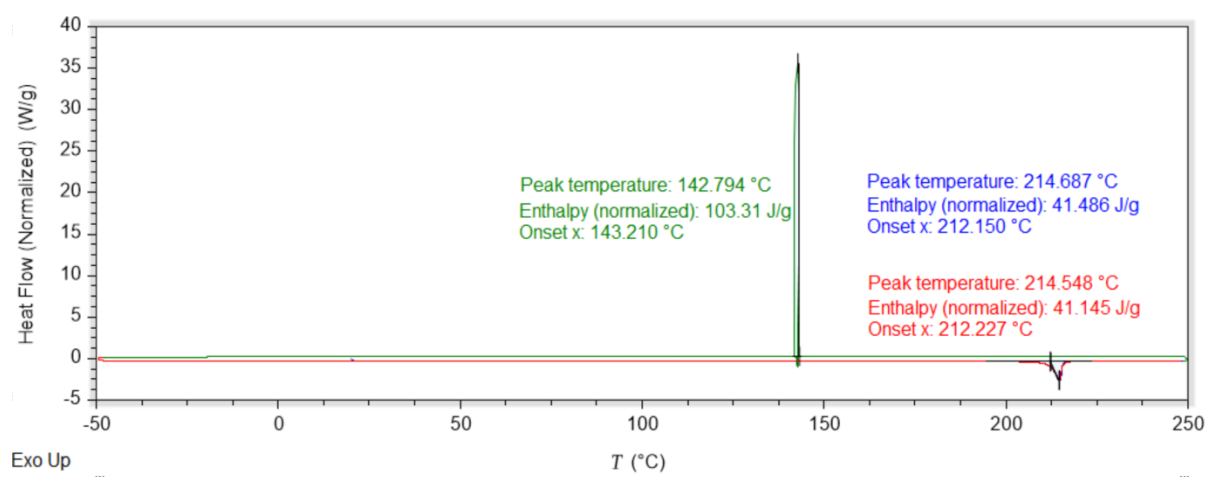

Figure S9: DSC trace for [EMBIM][Al(O<sup>+</sup>C<sub>4</sub>F<sub>9</sub>)<sub>4</sub>]. Key: blue = first heating cycle, green = cooling cycle, red = second heating cycle.

## Spectral Data

[EMIM][BAR<sup>F</sup>]:

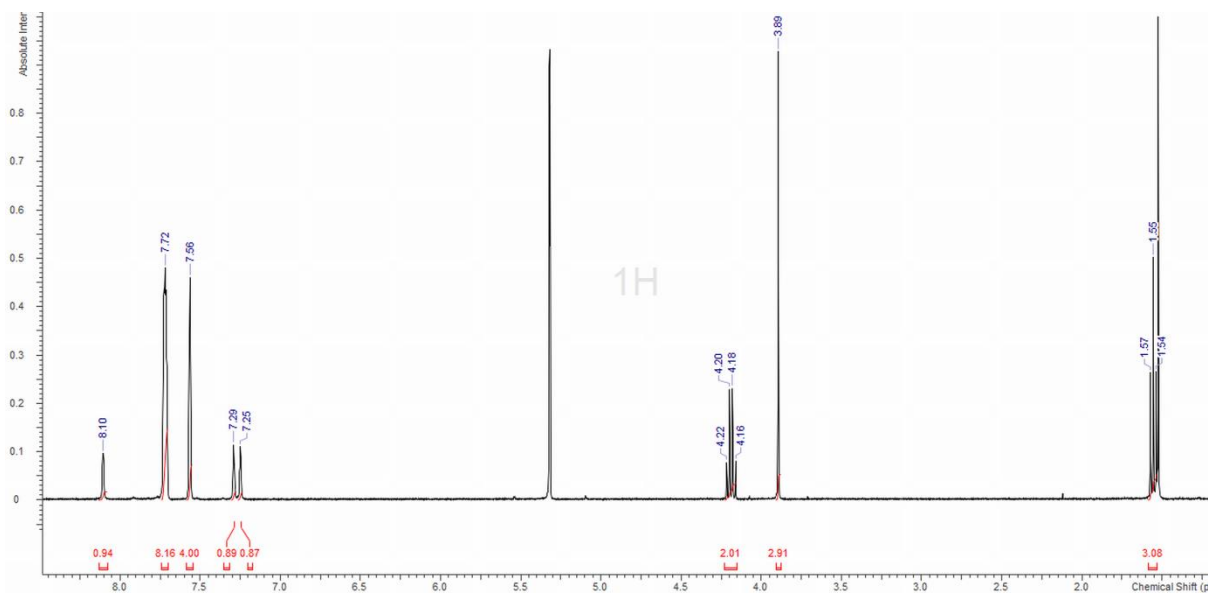

Figure S10: <sup>1</sup>H NMR spectrum (CD<sub>2</sub>Cl<sub>2</sub>, 298 K).

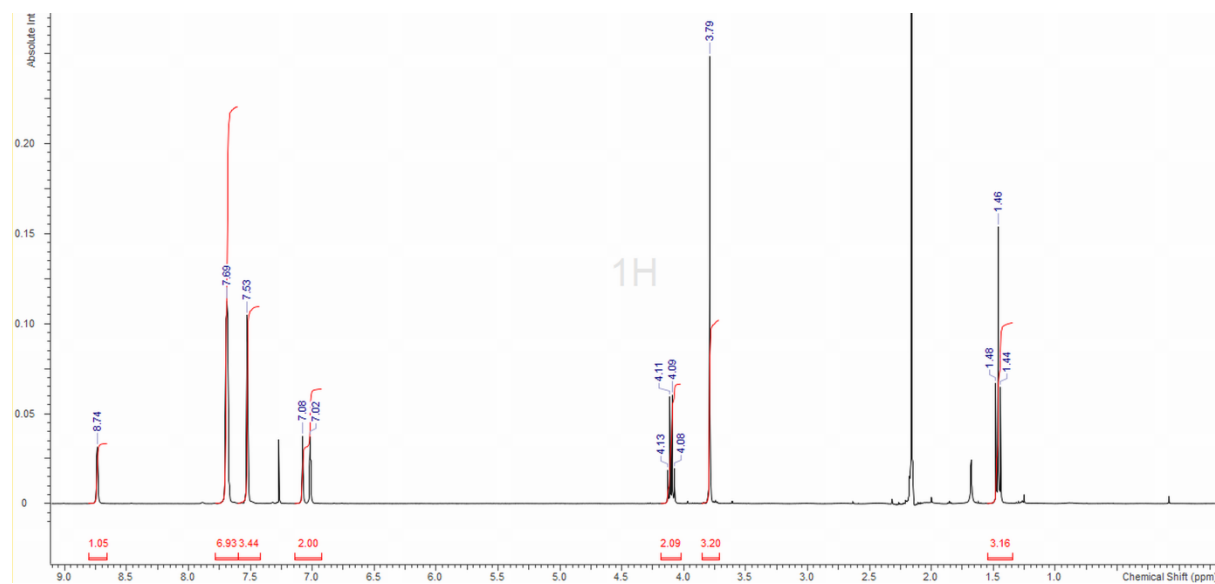

Figure S11: <sup>1</sup>H NMR spectrum (CDCl<sub>3</sub>, 298 K).

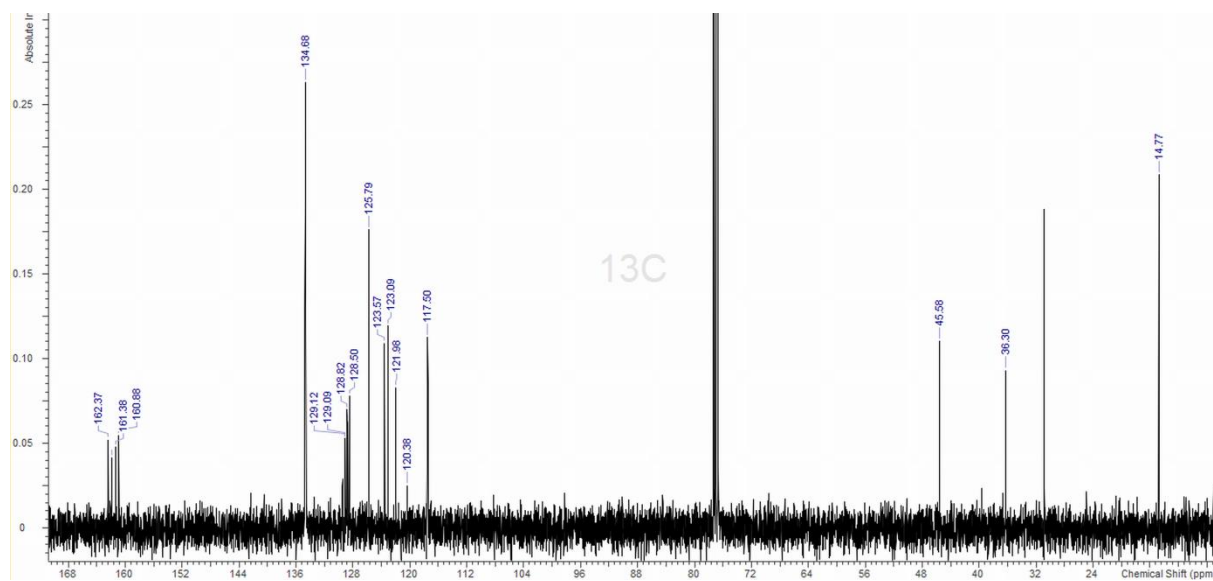

Figure S12:  $^{13}\text{C}\{^1\text{H}\}$  NMR spectrum ( $\text{CDCl}_3$ , 298 K).

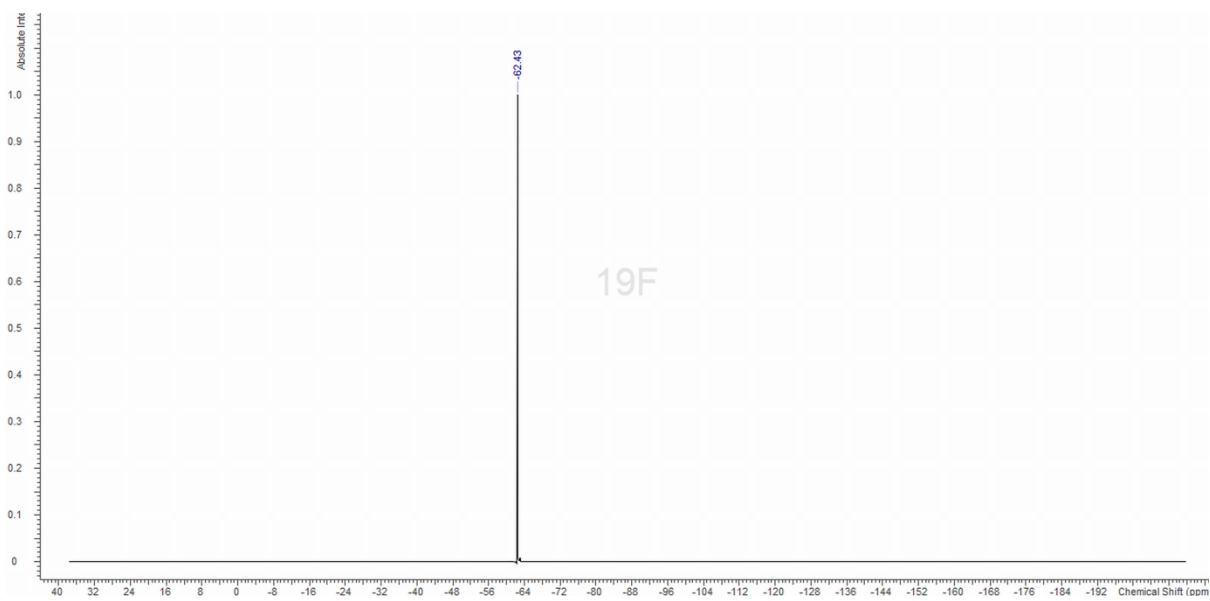

Figure S13:  $^{19}\text{F}\{^1\text{H}\}$  NMR spectrum ( $\text{CDCl}_3$ , 298 K).



[EDMIM][BAR<sup>F</sup>]:

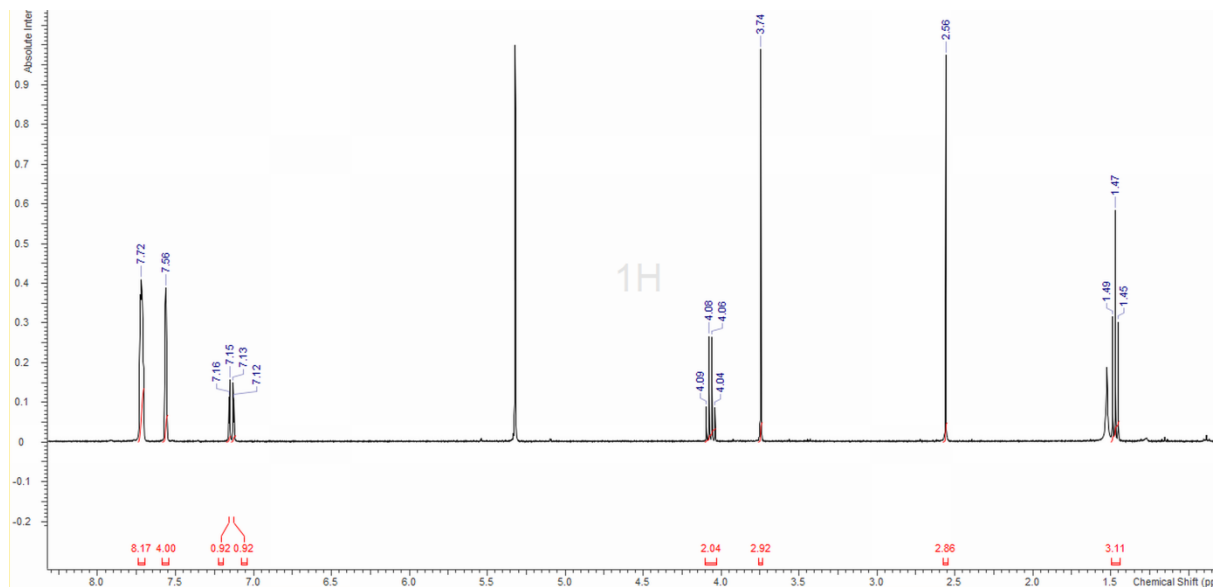

Figure S14: <sup>1</sup>H NMR spectrum (CD<sub>2</sub>Cl<sub>2</sub>, 298 K).

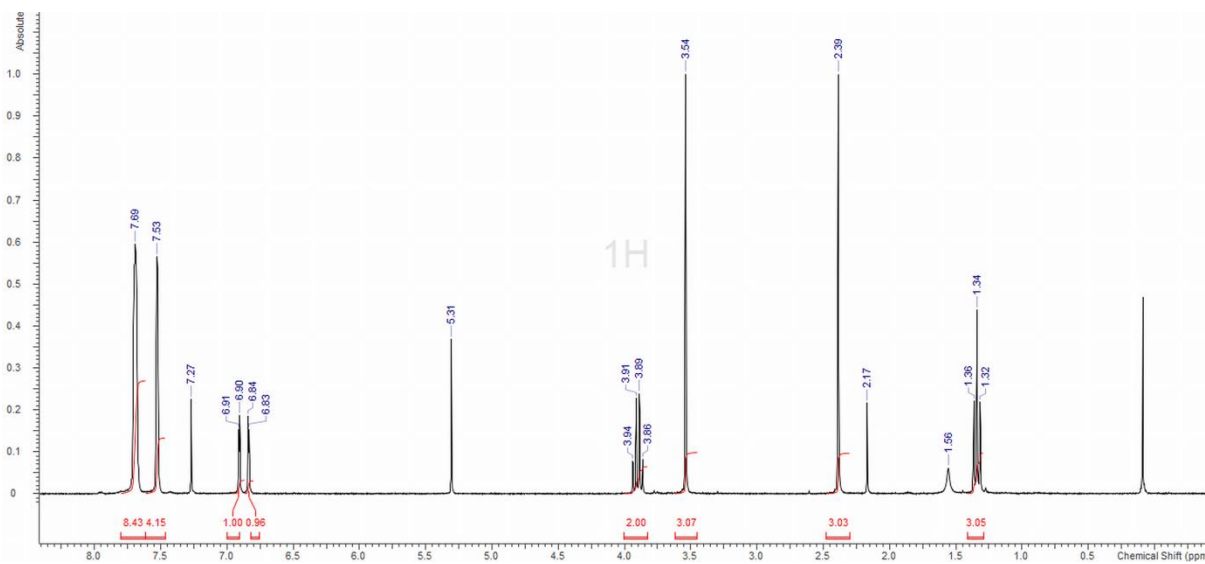

Figure S15: <sup>1</sup>H NMR spectrum (CDCl<sub>3</sub>, 298 K).

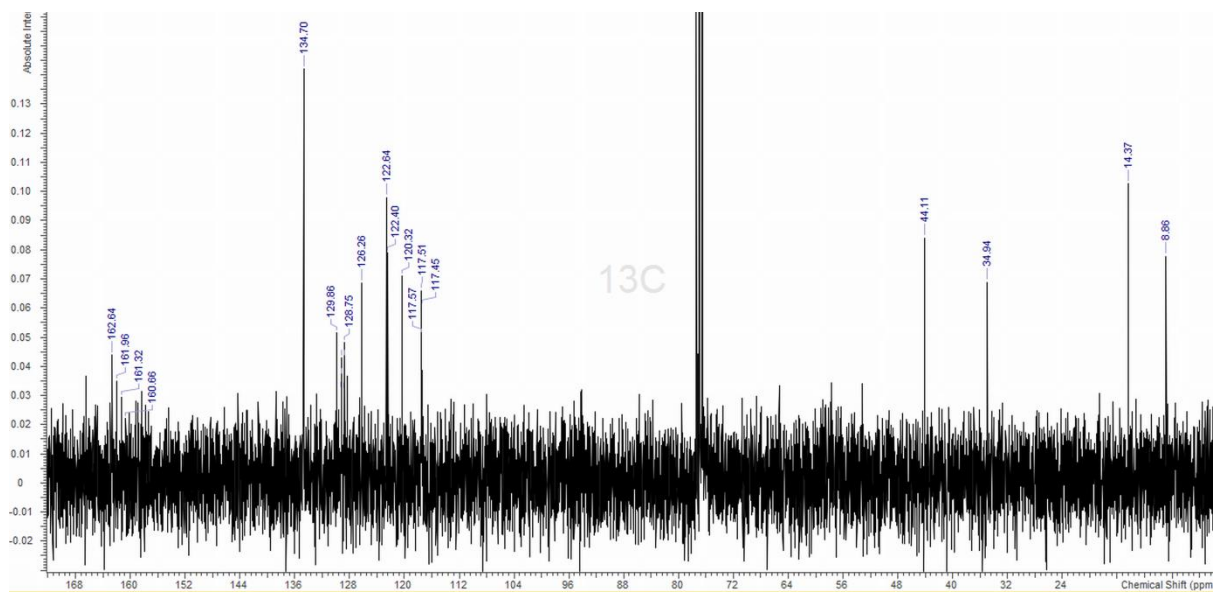

Figure S16:  $^{13}\text{C}\{^1\text{H}\}$  NMR spectrum (CDCl<sub>3</sub>, 298 K).

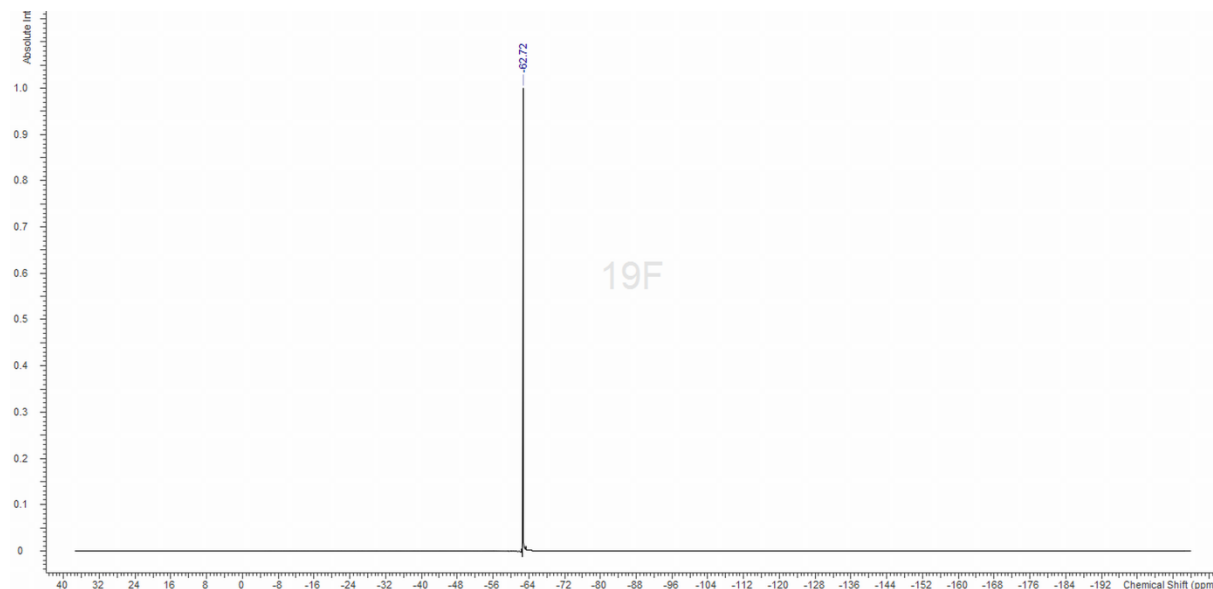

Figure S17:  $^{19}\text{F}\{^1\text{H}\}$  NMR spectrum (CDCl<sub>3</sub>, 295 K).

[HMIM][BAR<sup>F</sup>]:

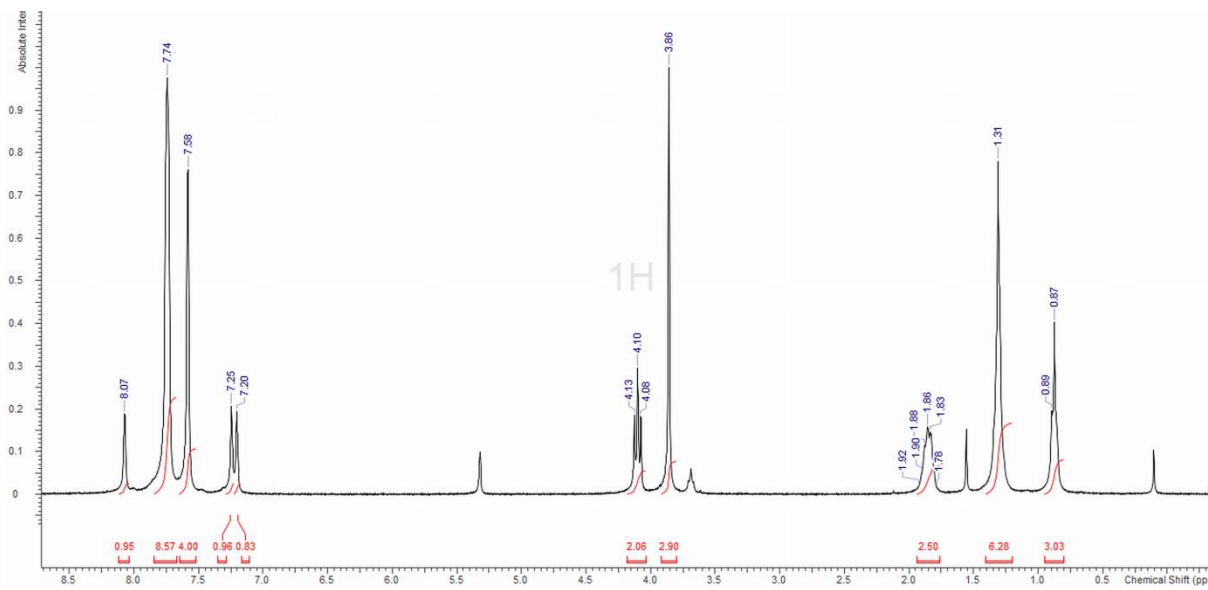

Figure S18: <sup>1</sup>H NMR spectrum (CD<sub>2</sub>Cl<sub>2</sub>, 298 K).

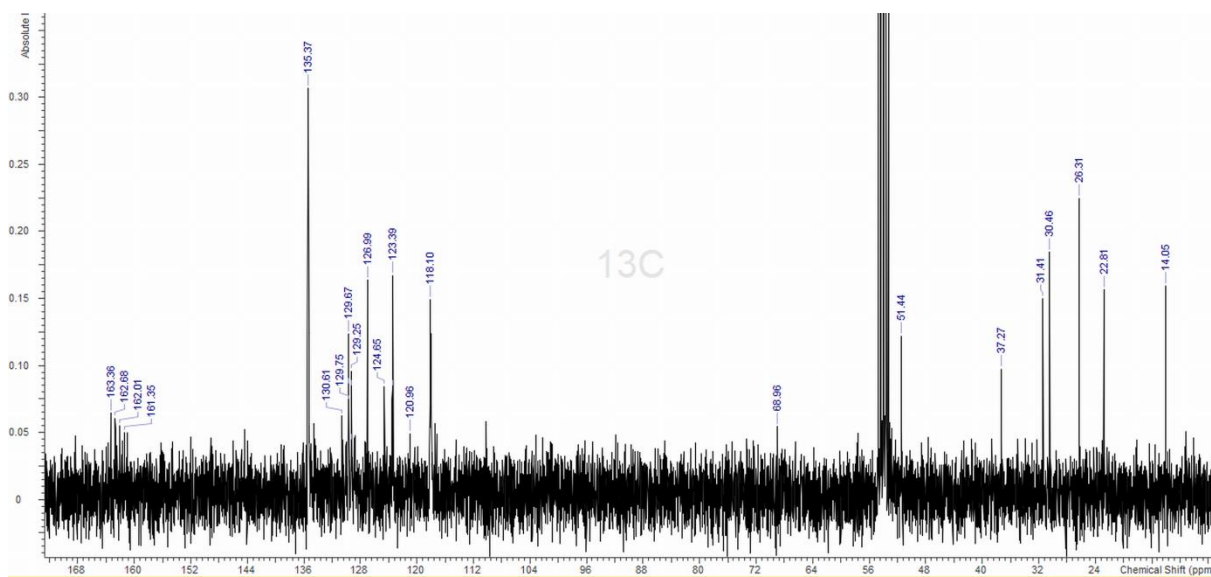

Figure S19: <sup>13</sup>C{<sup>1</sup>H} NMR spectrum (CD<sub>2</sub>Cl<sub>2</sub>, 298 K).

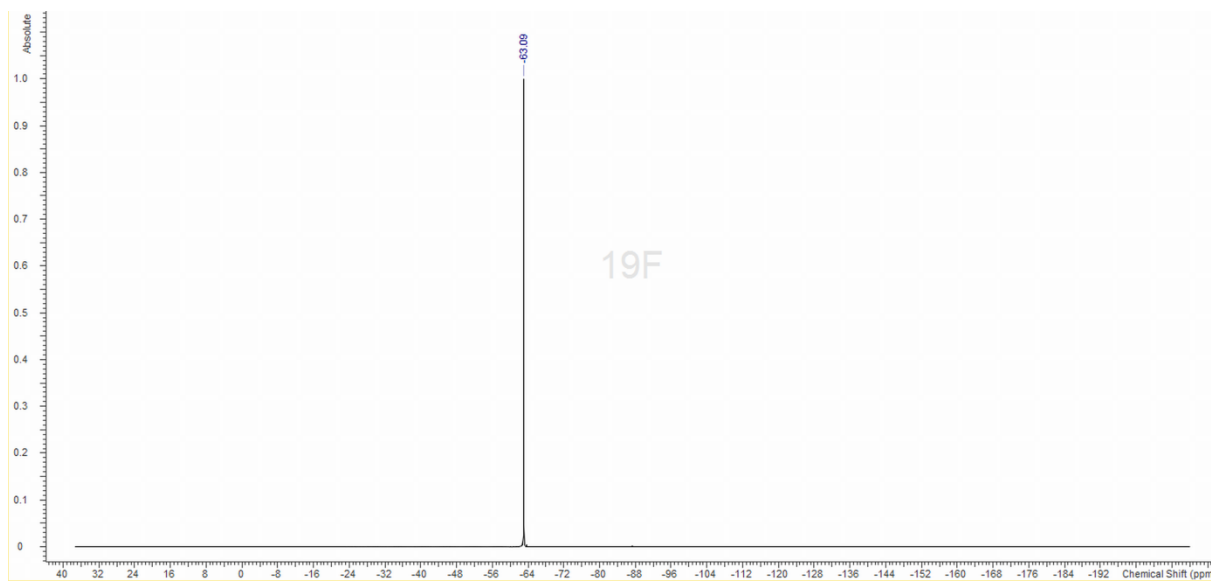

Figure S20:  $^{19}\text{F}\{^1\text{H}\}$  NMR spectrum ( $\text{CD}_2\text{Cl}_2$ , 298 K).

[EMBIM][BAR<sup>F</sup>]:

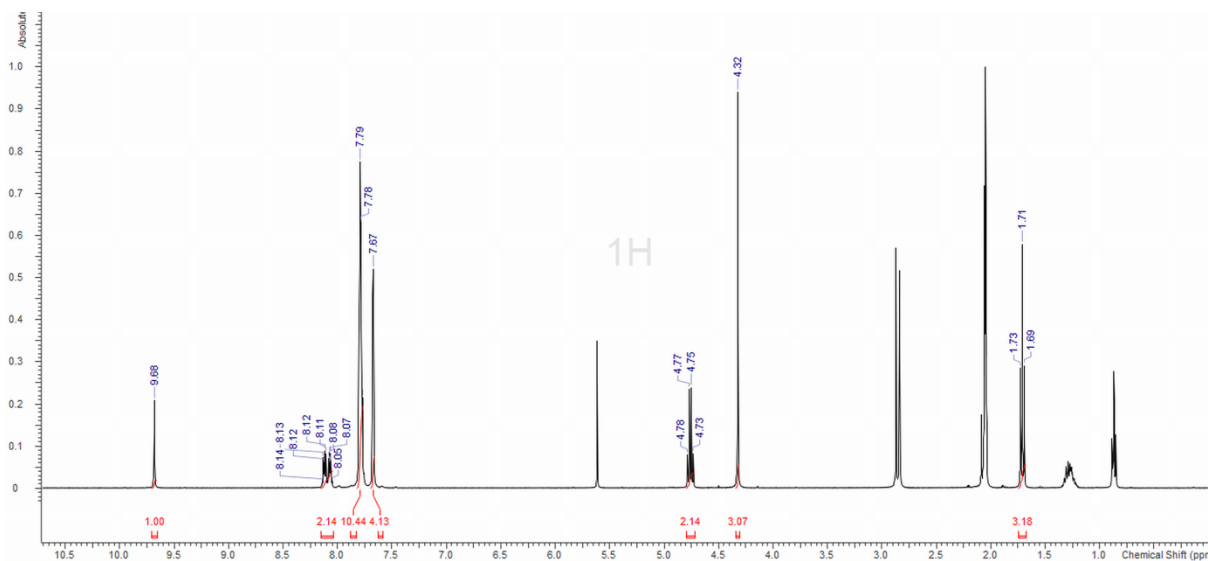

Figure S21: <sup>1</sup>H NMR spectrum (CD<sub>2</sub>Cl<sub>2</sub>, 298 K).

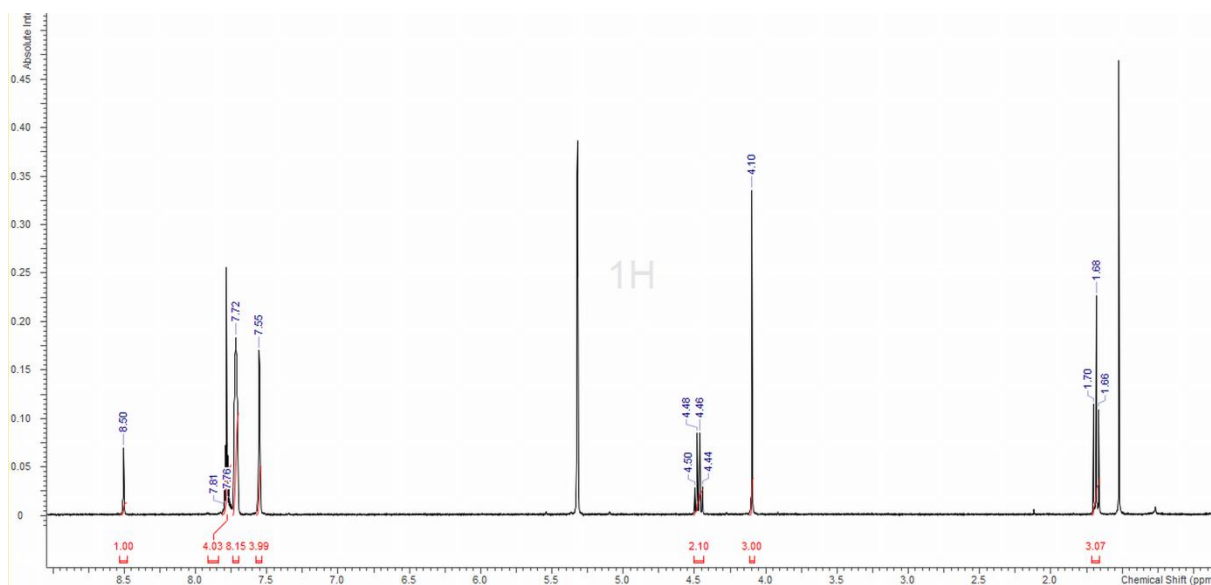

Figure S22: <sup>1</sup>H NMR spectrum ((CD<sub>3</sub>)<sub>2</sub>CO, 298 K).

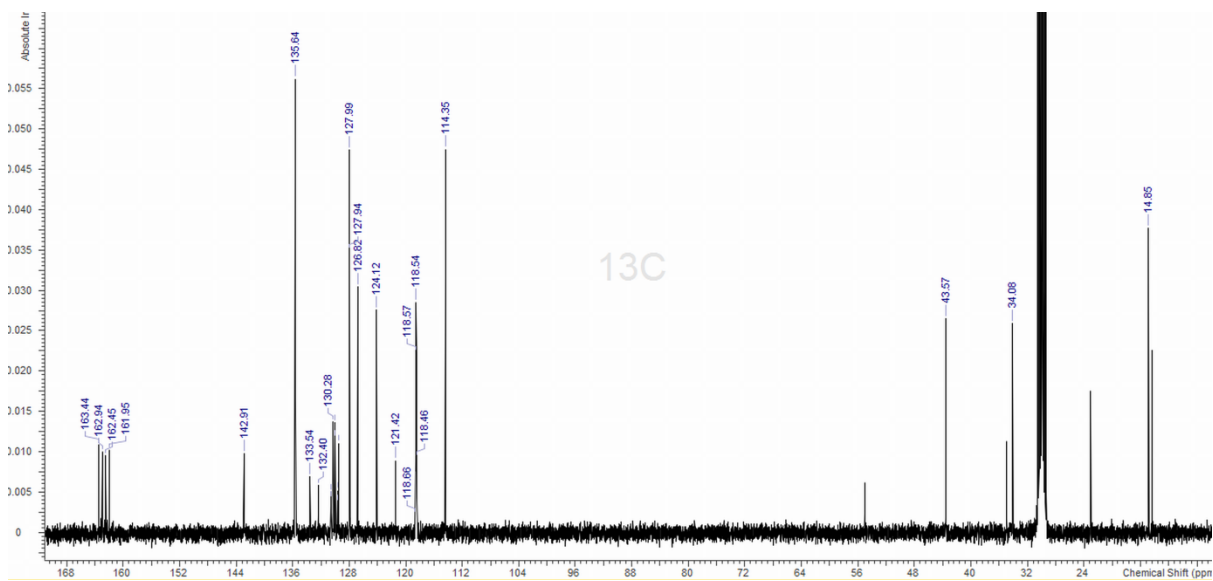

Figure S23:  $^{13}\text{C}\{^1\text{H}\}$  NMR spectrum ( $(\text{CD}_3)_2\text{CO}$ , 298 K).

[IDiPPH][BAR<sup>F</sup>]:

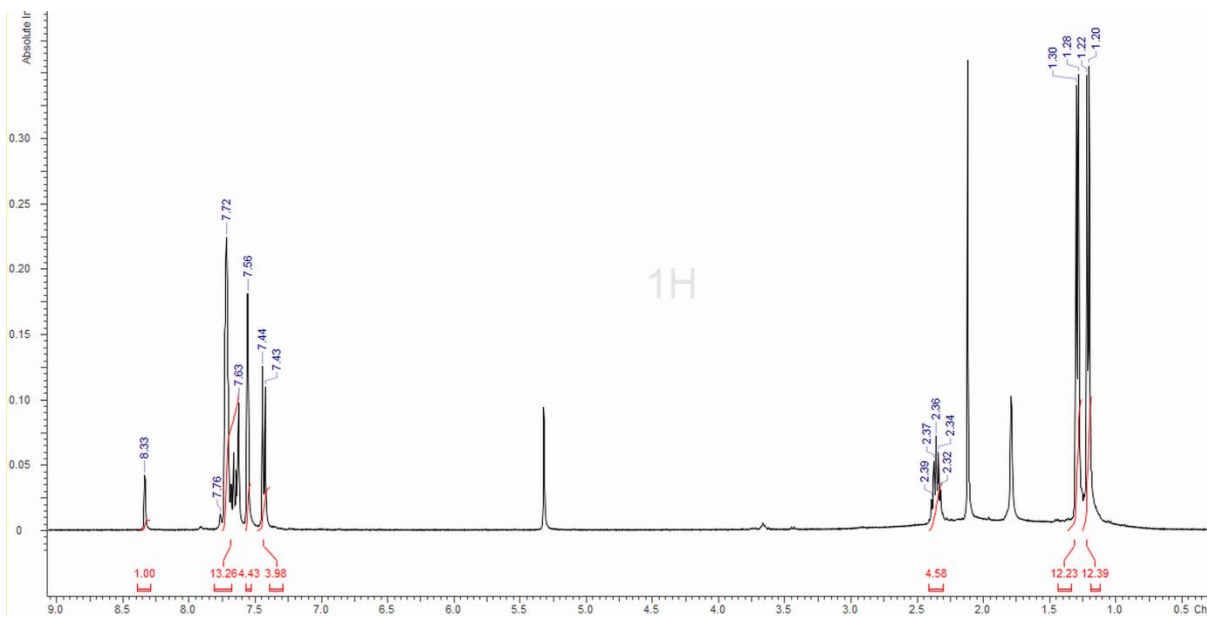

Figure S24: <sup>1</sup>H NMR spectrum (CD<sub>2</sub>Cl<sub>2</sub>, 298 K).

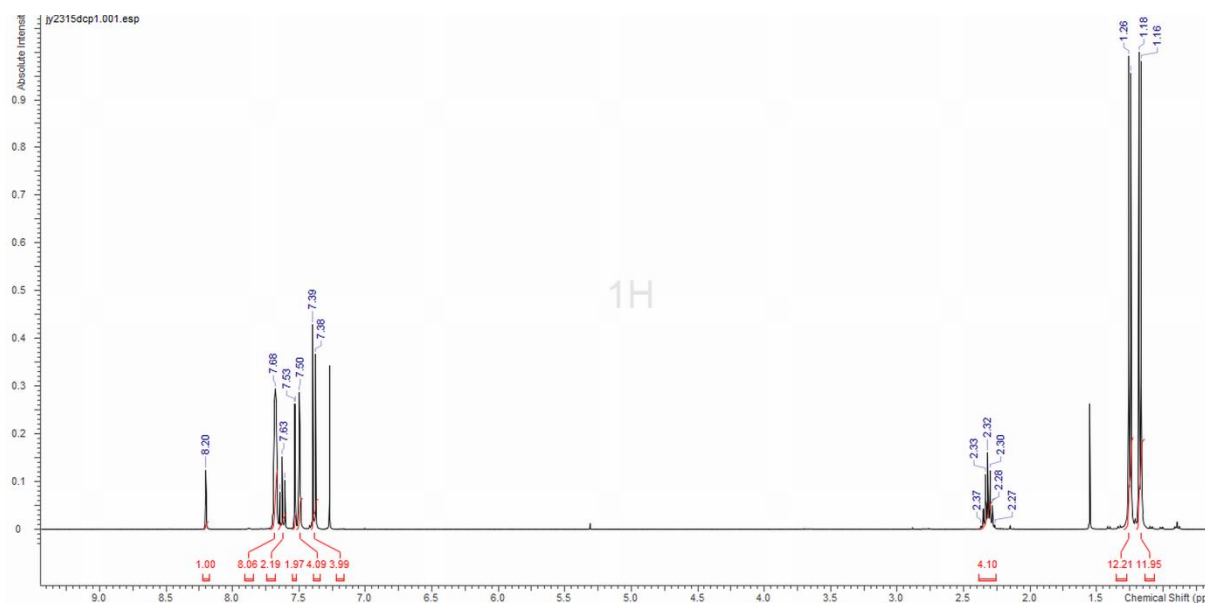

Figure S25: <sup>1</sup>H NMR spectrum (CDCl<sub>3</sub>, 298 K).

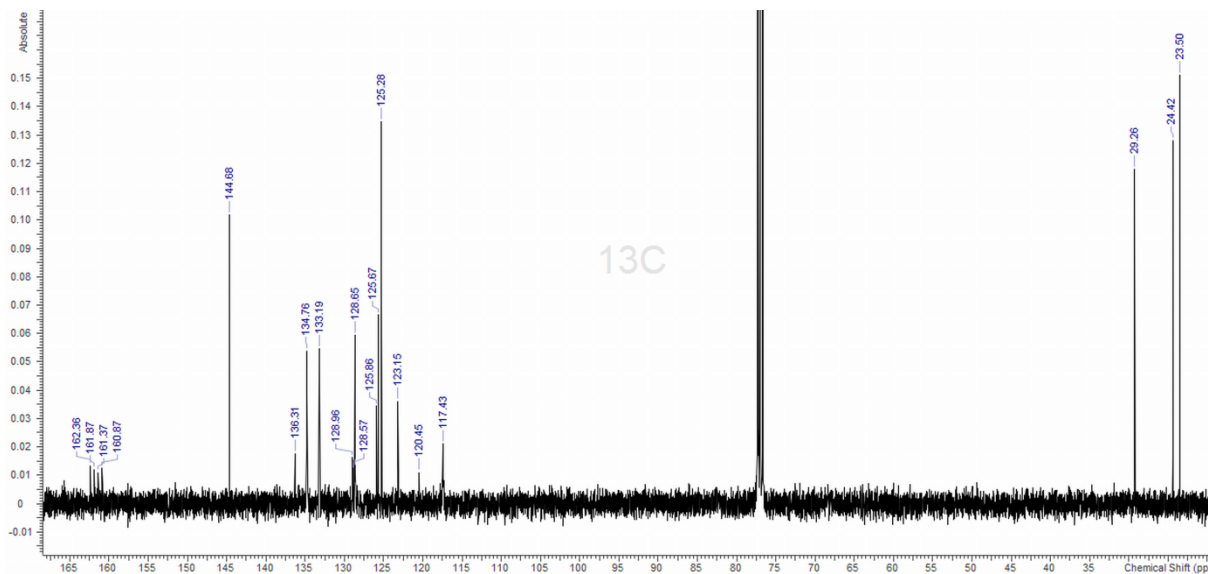

Figure S26:  $^{13}\text{C}\{^1\text{H}\}$  NMR spectrum ( $\text{CDCl}_3$ , 298 K).



[BMPYRR][BAr<sup>F</sup>]:

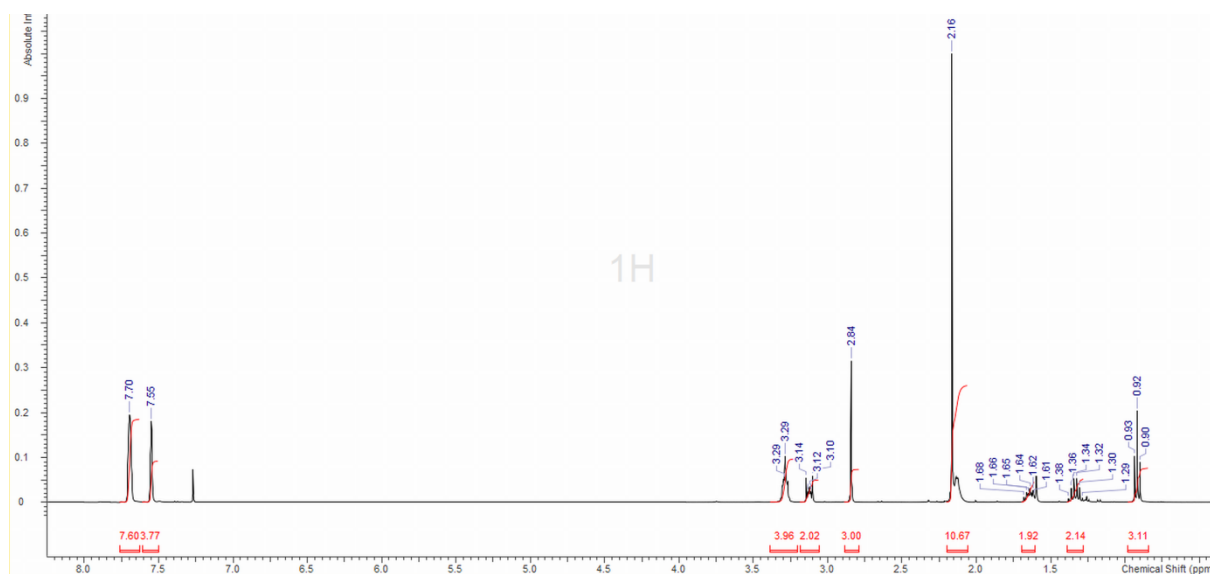

Figure S27: <sup>1</sup>H NMR spectrum (CDCl<sub>3</sub>, 298 K).

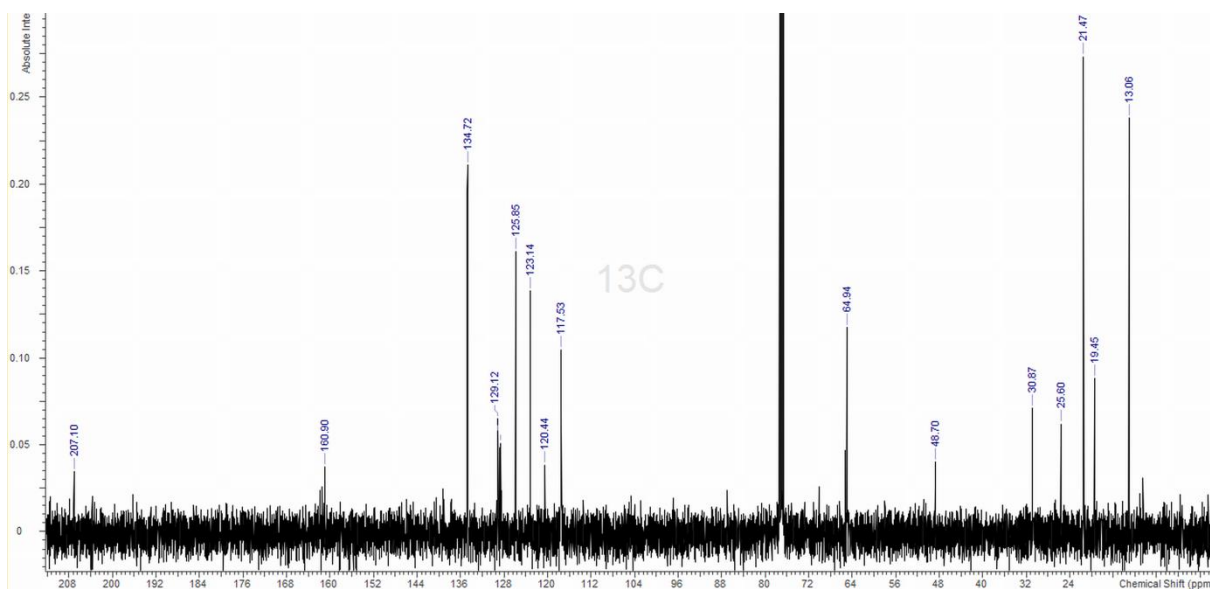

Figure S28: <sup>13</sup>C{<sup>1</sup>H} NMR spectrum (CDCl<sub>3</sub>, 298 K).

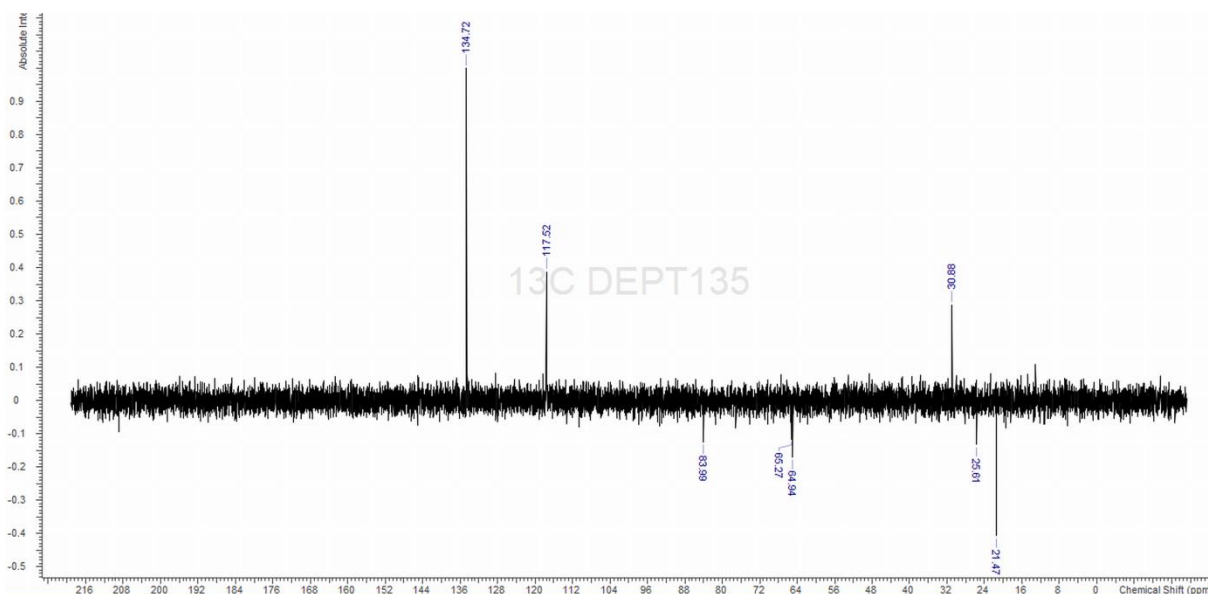

Figure S29: DEPT-135 NMR spectrum ( $\text{CDCl}_3$ , 298 K).

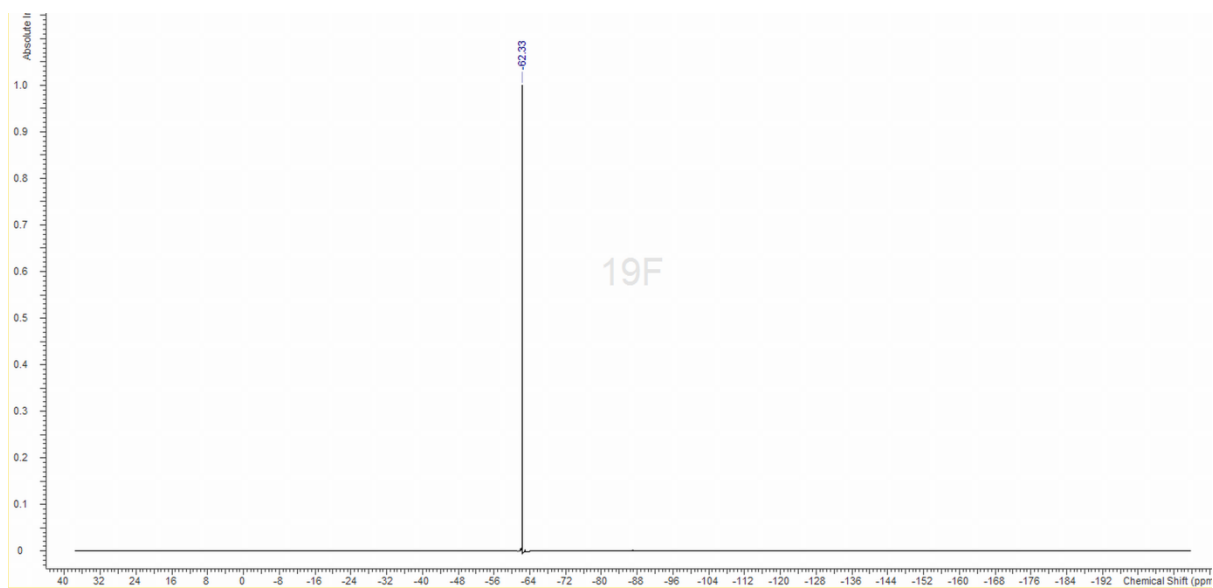

Figure S30:  $^{19}\text{F}\{^1\text{H}\}$  NMR spectrum ( $\text{CDCl}_3$ , 298 K).

[EMIM][Al(O<sup>t</sup>C<sub>4</sub>F<sub>9</sub>)<sub>4</sub>]:

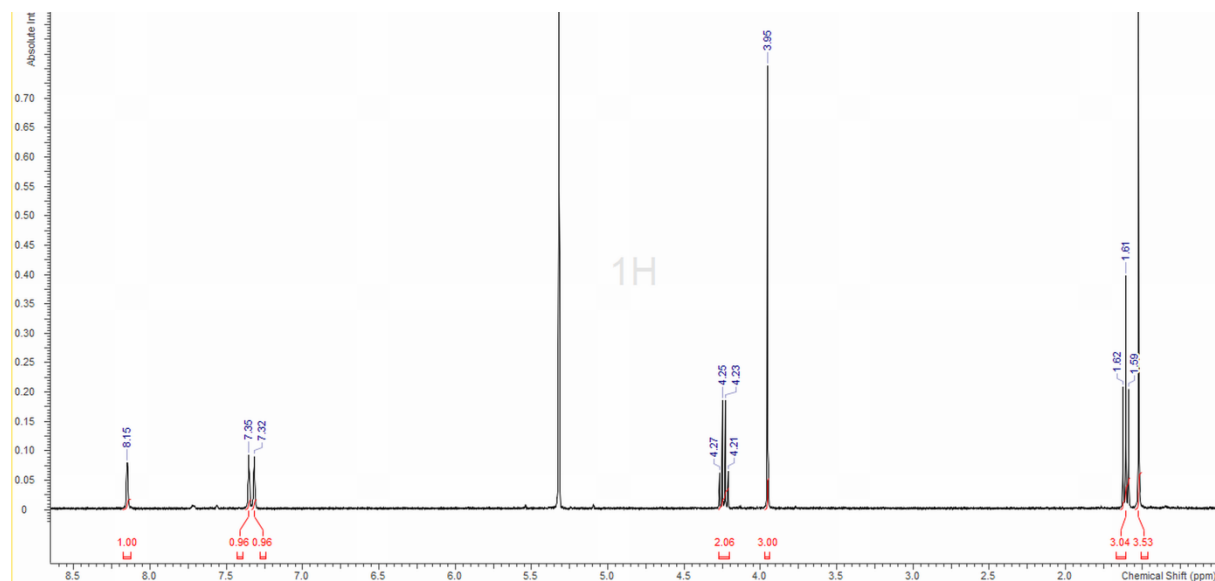

Figure S31: <sup>1</sup>H NMR spectrum (CD<sub>2</sub>Cl<sub>2</sub>, 298 K).

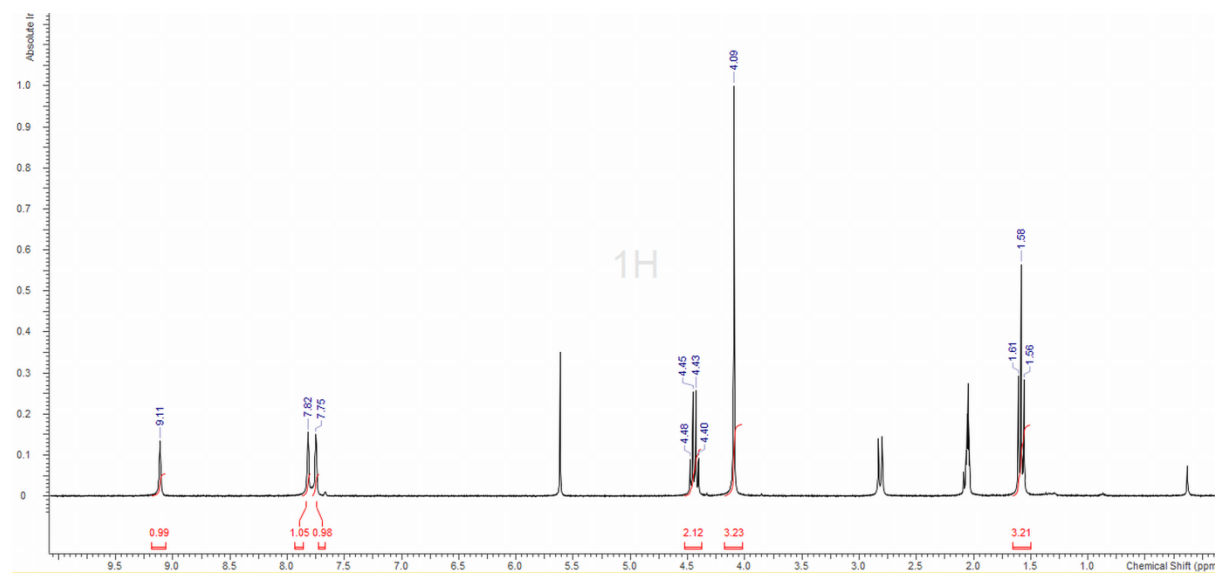

Figure S32: <sup>1</sup>H NMR spectrum ((CD<sub>3</sub>)<sub>2</sub>CO, 298 K).

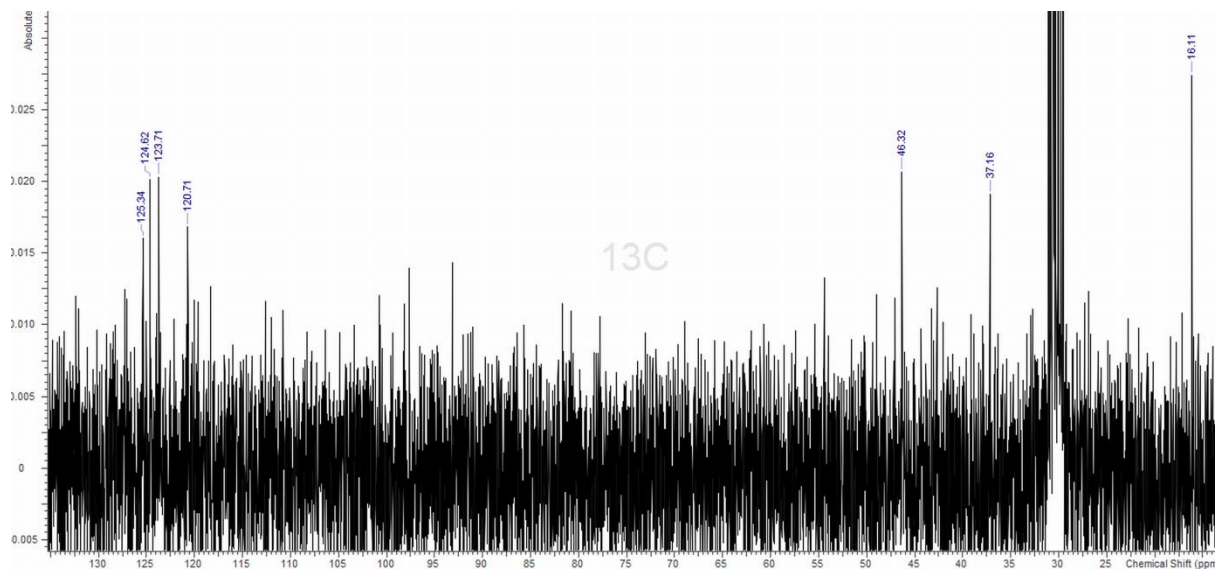

Figure S33:  $^{13}\text{C}\{^1\text{H}\}$  NMR spectrum ( $(\text{CD}_3)_2\text{CO}$ , 298 K).

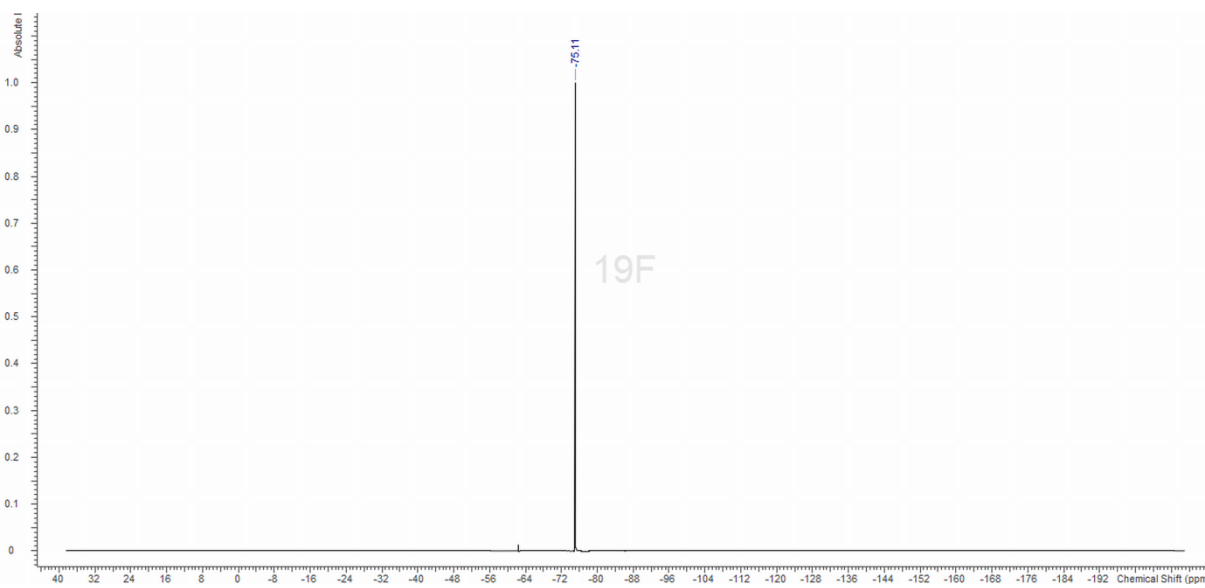

Figure S34:  $^{19}\text{F}\{^1\text{H}\}$  NMR spectrum ( $(\text{CD}_3)_2\text{CO}$ , 298 K).

[EDMIM][Al(O<sup>t</sup>C<sub>4</sub>F<sub>9</sub>)<sub>4</sub>]:

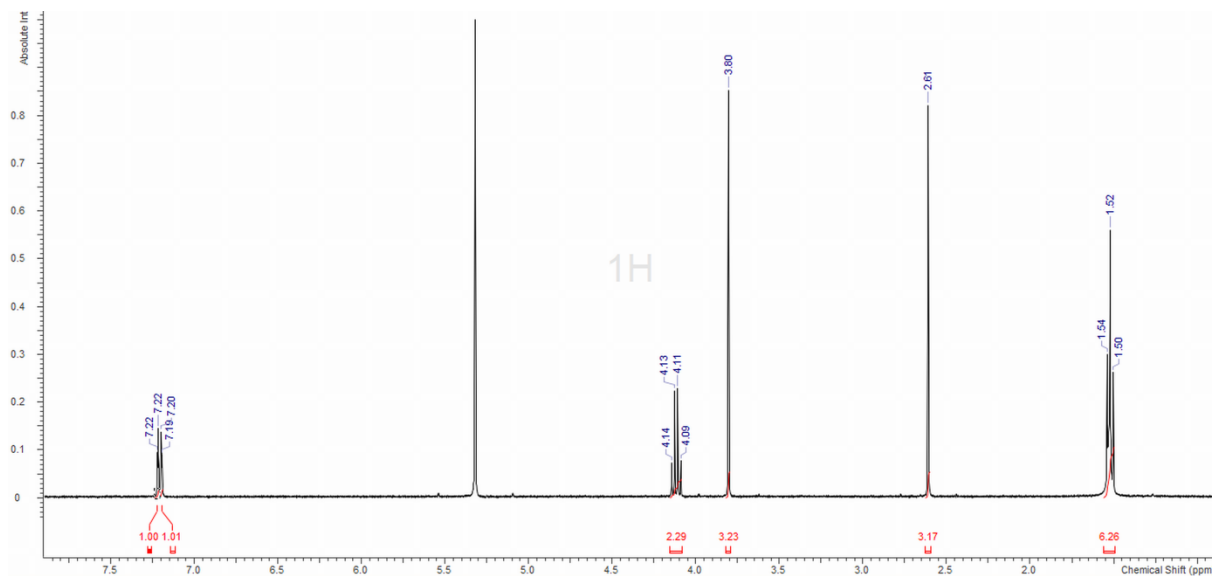

Figure S35: <sup>1</sup>H NMR spectrum (CD<sub>2</sub>Cl<sub>2</sub>, 298 K).

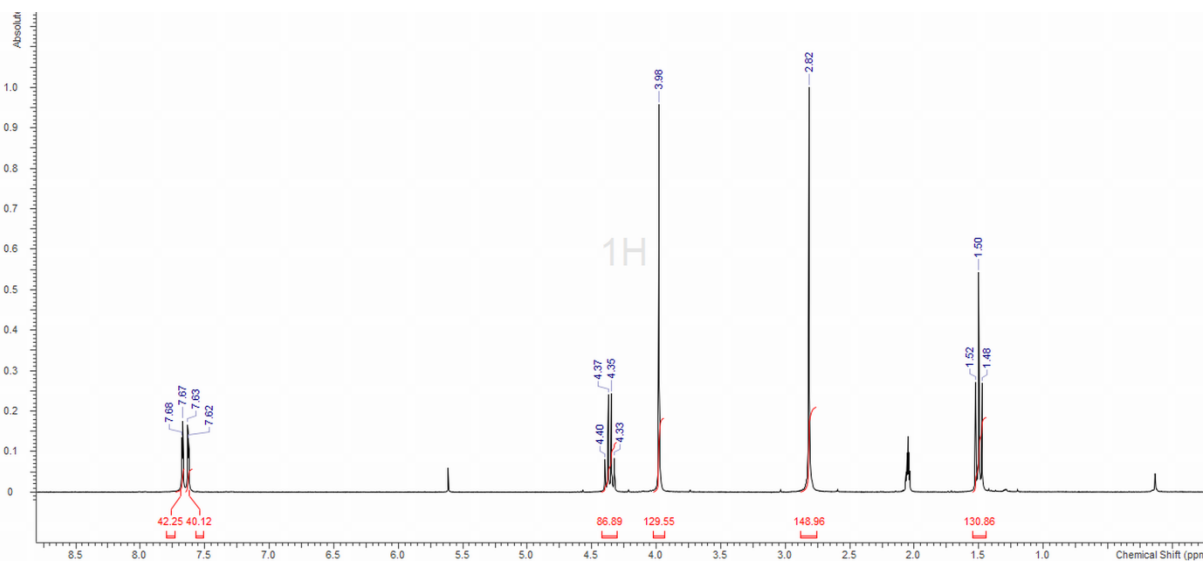

Figure S36: <sup>1</sup>H NMR spectrum ((CD<sub>3</sub>)<sub>2</sub>CO, 298 K).

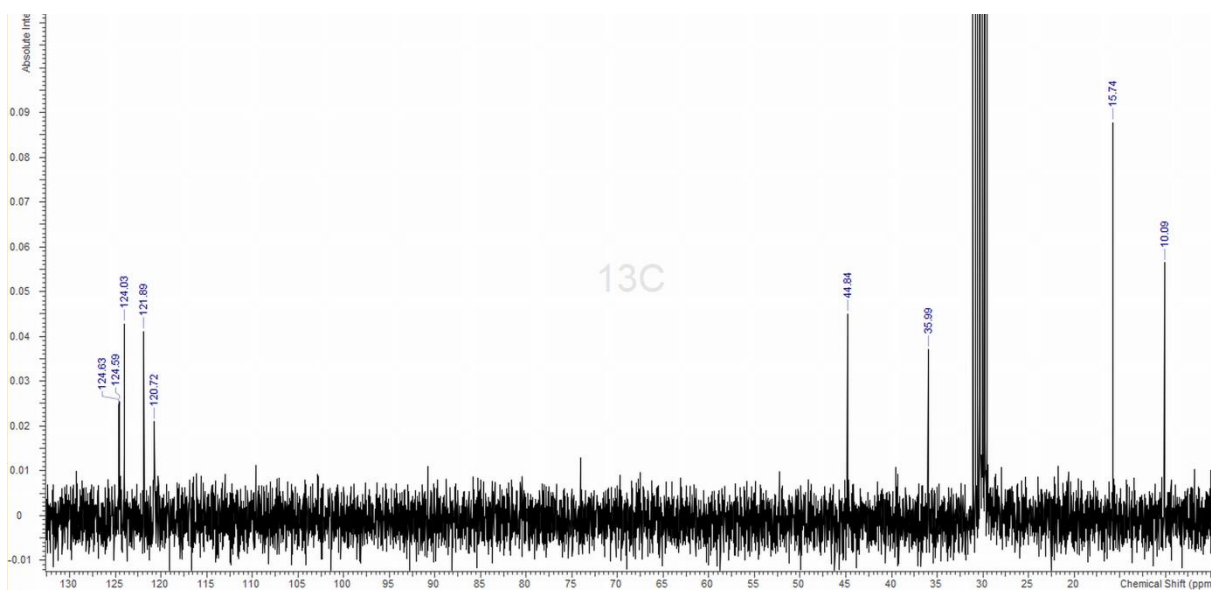

Figure S37:  $^{13}\text{C}\{^1\text{H}\}$  NMR spectrum ( $(\text{CD}_3)_2\text{CO}$ , 298 K).

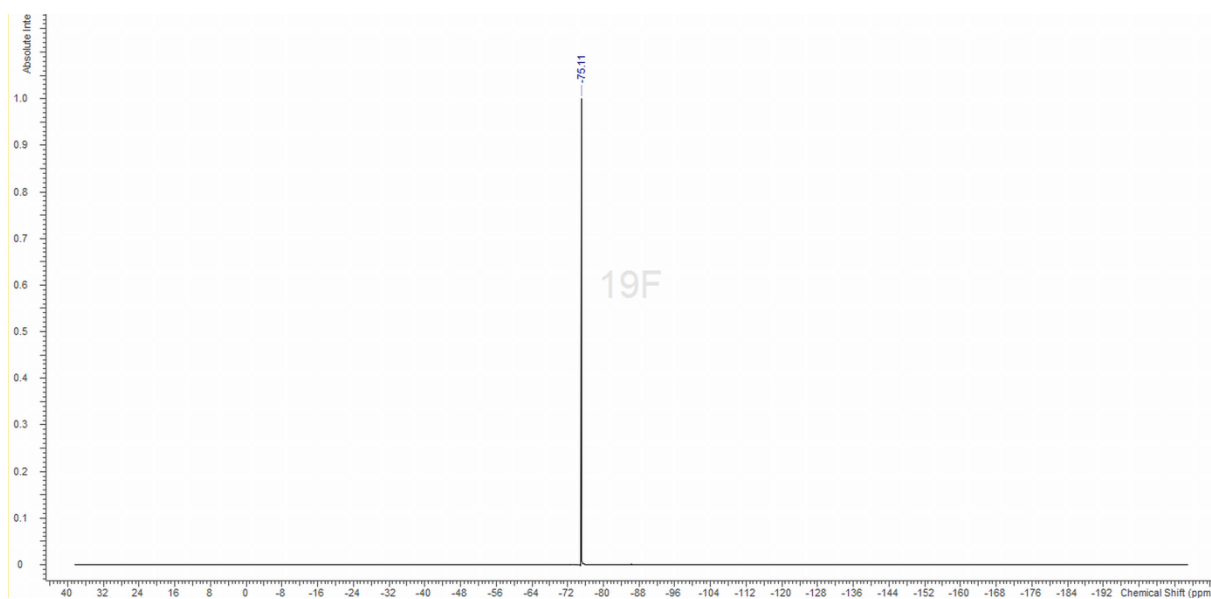

Figure S38:  $^{19}\text{F}\{^1\text{H}\}$  NMR spectrum ( $(\text{CD}_3)_2\text{CO}$ , 298 K).

[HMIM][Al(O<sup>t</sup>C<sub>4</sub>F<sub>9</sub>)<sub>4</sub>]:

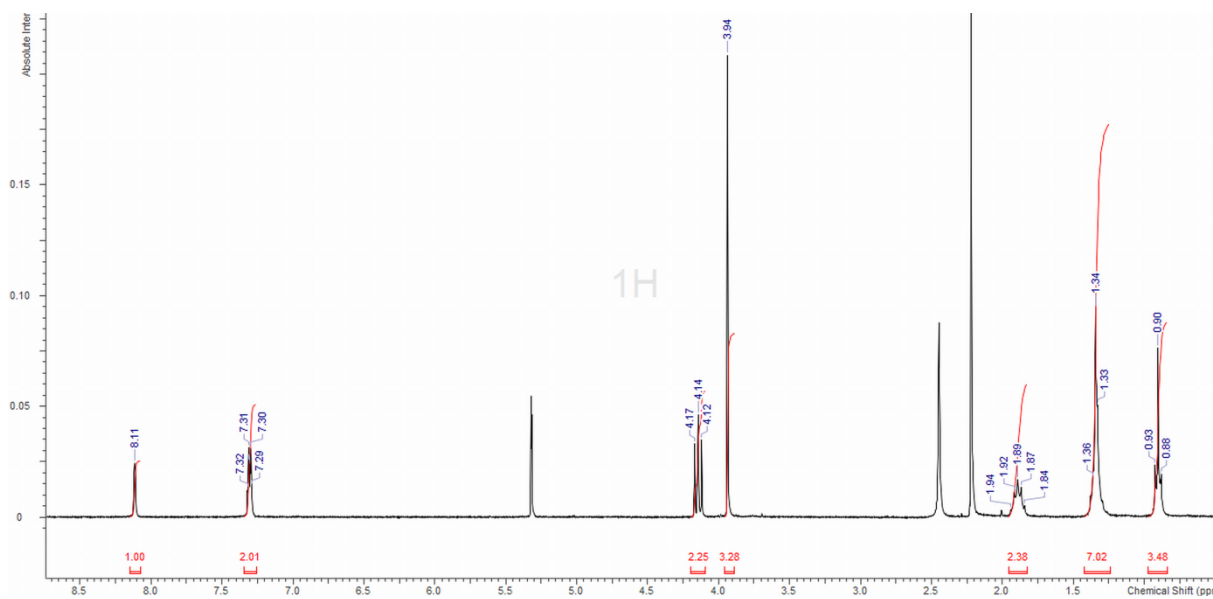

Figure S39: <sup>1</sup>H NMR spectrum (CD<sub>2</sub>Cl<sub>2</sub>, 298 K).

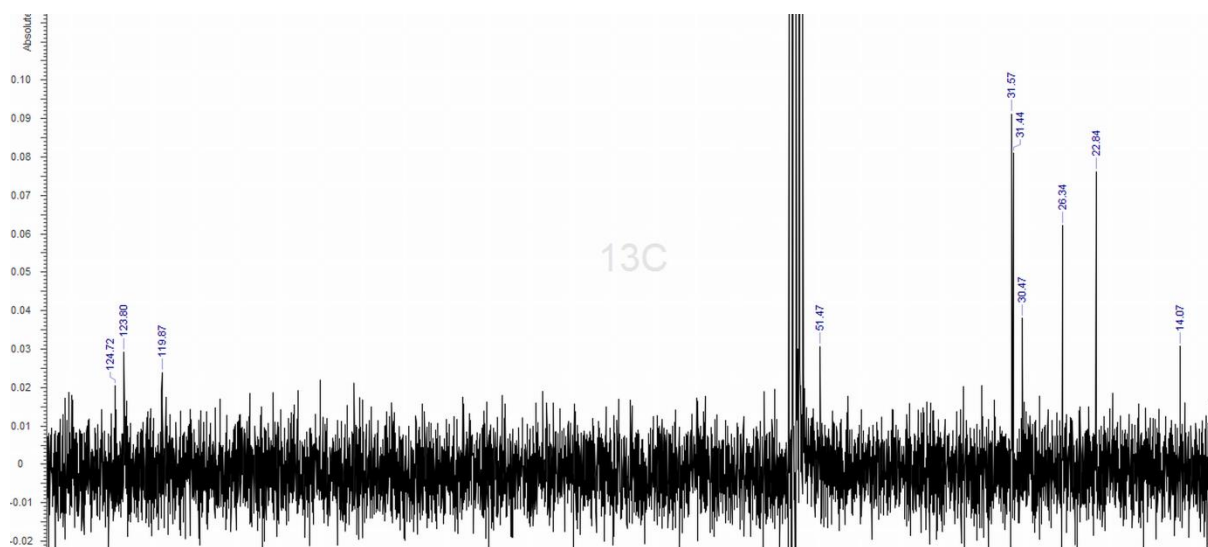

Figure S40: <sup>13</sup>C{<sup>1</sup>H} NMR spectrum (CD<sub>2</sub>Cl<sub>2</sub>, 298 K).

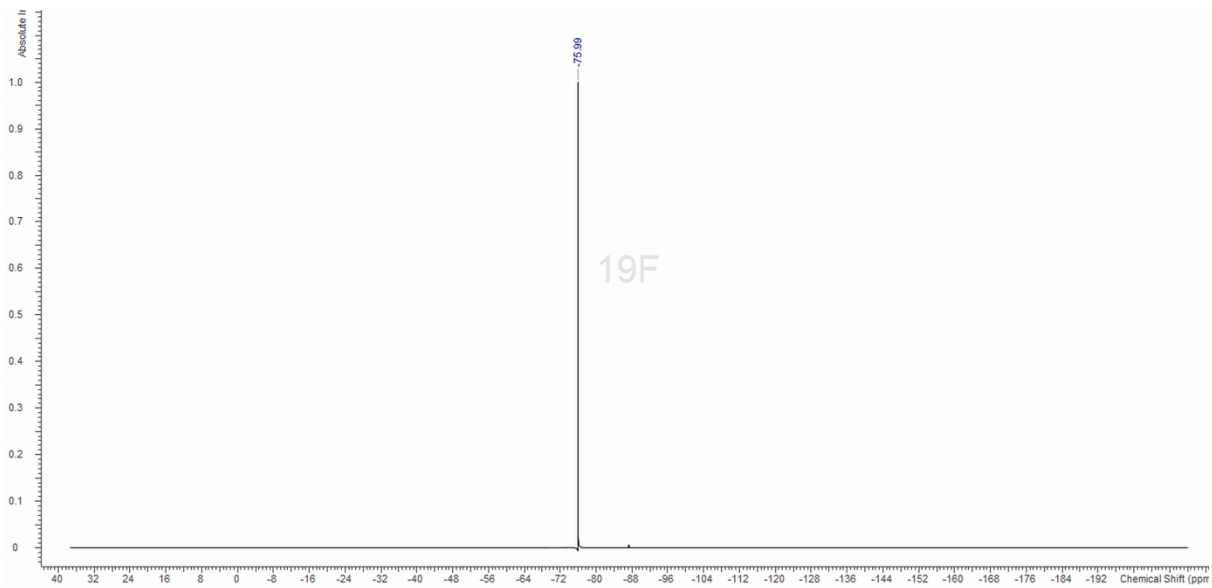

Figure S41:  $^{19}\text{F}\{^1\text{H}\}$  NMR spectrum ( $\text{CD}_2\text{Cl}_2$ , 298 K).



[EMBIM][Al(O<sup>t</sup>C<sub>4</sub>F<sub>9</sub>)<sub>4</sub>]:

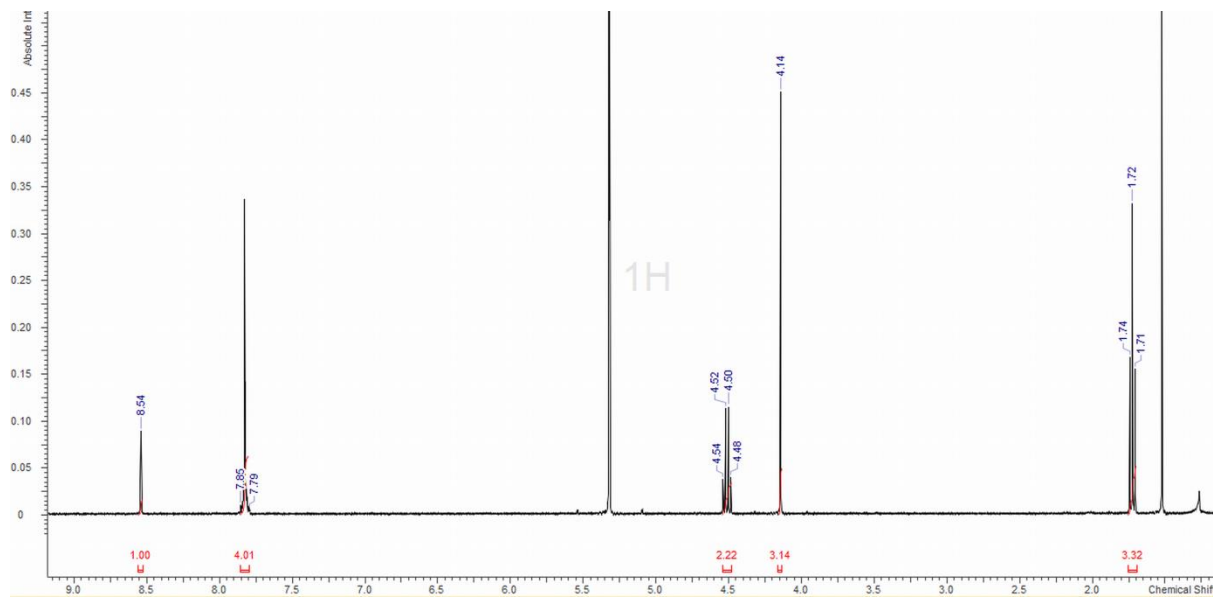

Figure S42: <sup>1</sup>H NMR spectrum (CD<sub>2</sub>Cl<sub>2</sub>, 298 K).

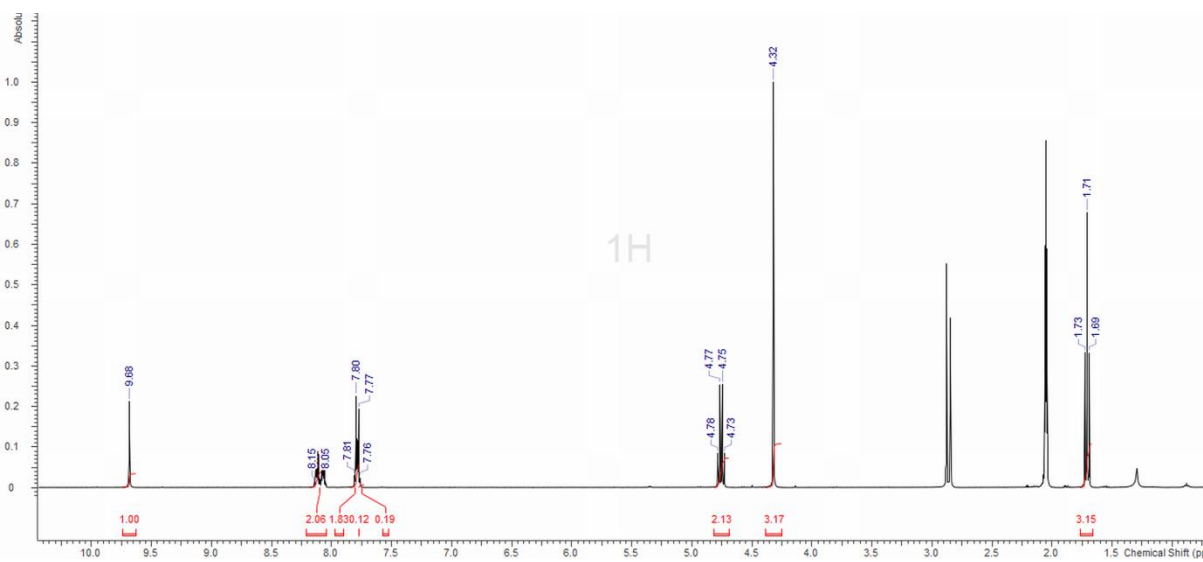

Figure S43: <sup>1</sup>H NMR spectrum ((CD<sub>3</sub>)<sub>2</sub>CO, 298 K).

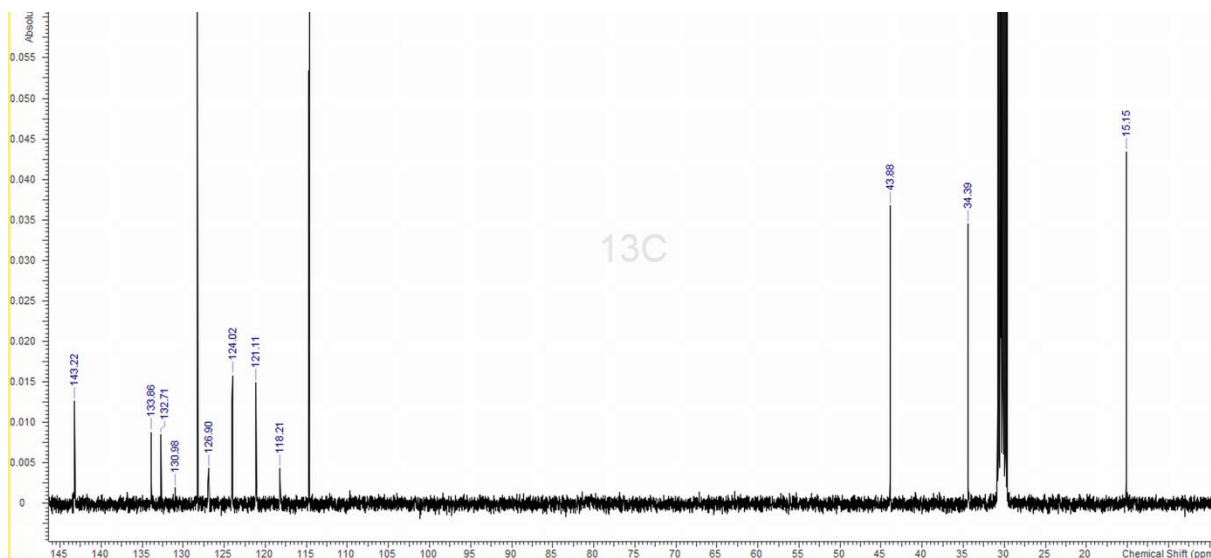

Figure S44:  $^{13}\text{C}\{^1\text{H}\}$  NMR spectrum ( $(\text{CD}_3)_2\text{CO}$ , 298 K).

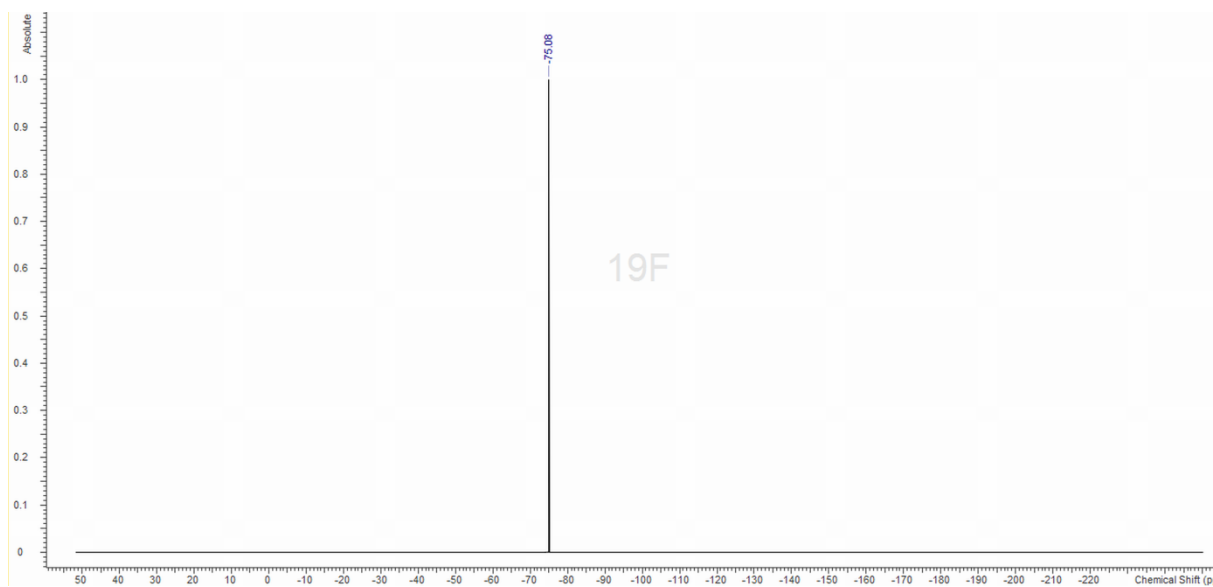

Figure S45:  $^{19}\text{F}\{^1\text{H}\}$  NMR spectrum ( $(\text{CD}_3)_2\text{CO}$ , 298 K).
